# Supplementary material
Source: PubMed Central journal article supplement (PMC11105060)
Supplement: 18_2019_3442_MOESM1_ESM.pdf [file 18_2019_3442_MOESM1_ESM.pdf]

Supp. Fig. 1

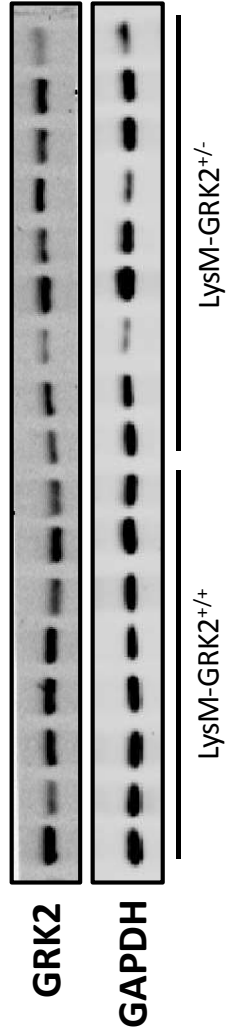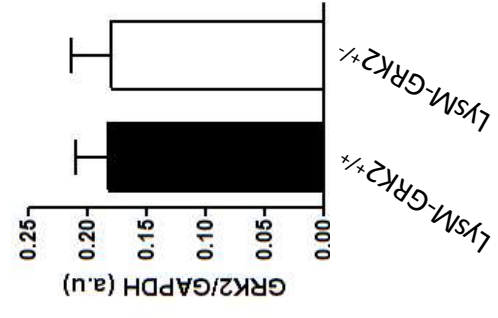

Supp. Fig. 2

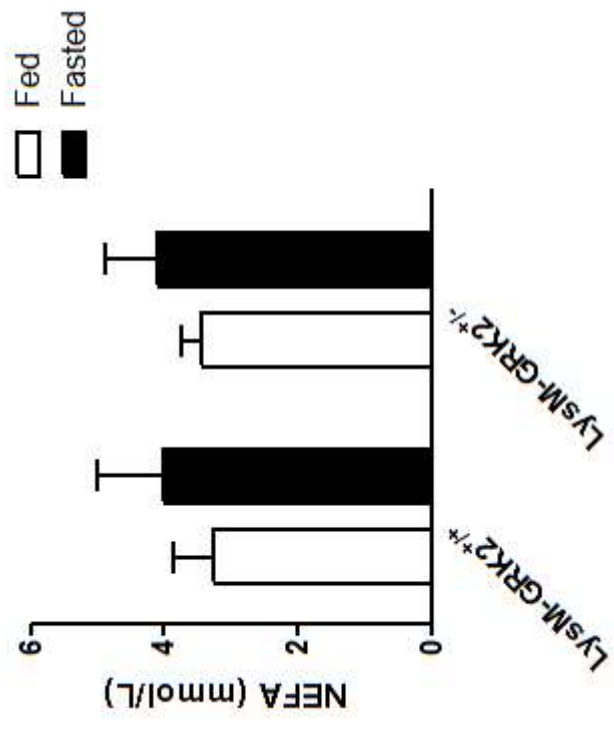

# Supp. Fig. 3

**a**

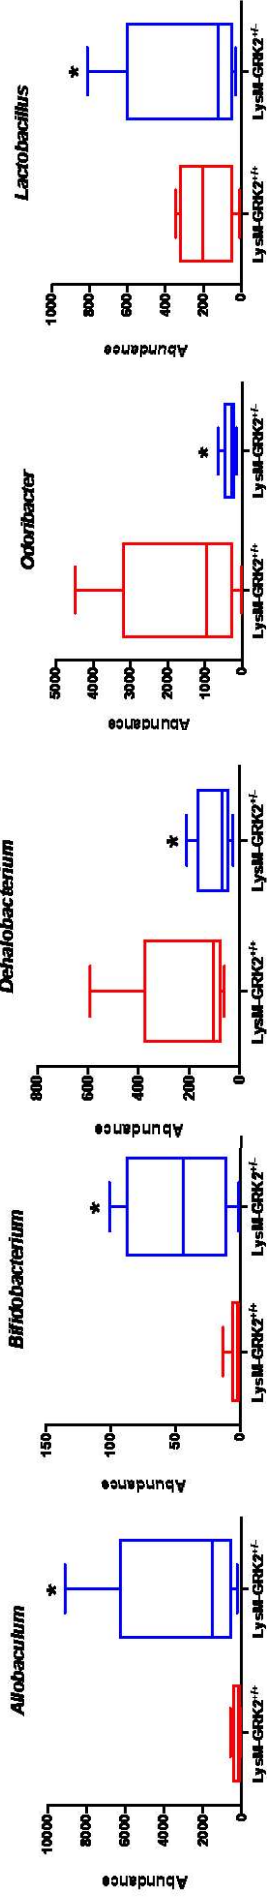

**b**

**LysM-GRK2<sup>+/+</sup>**

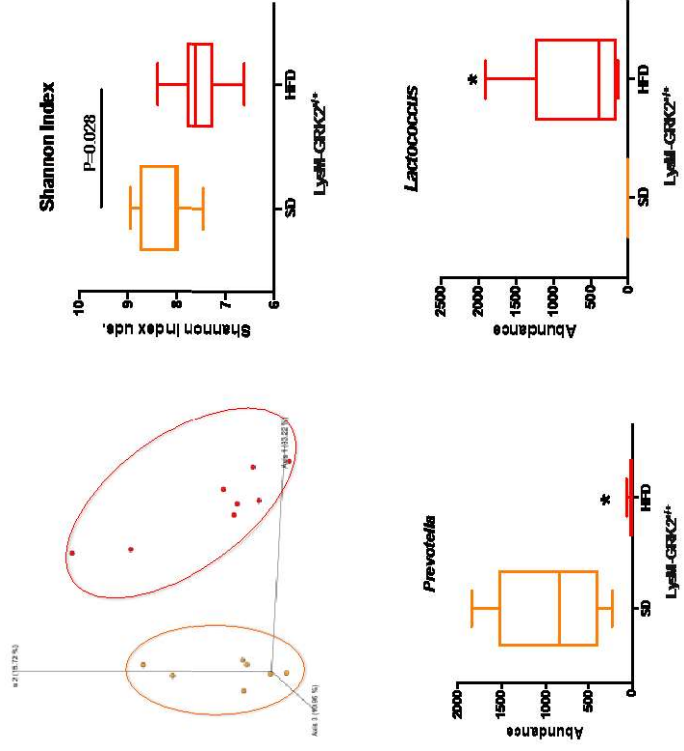

**c**

**LysM-GRK2<sup>+/-</sup>**

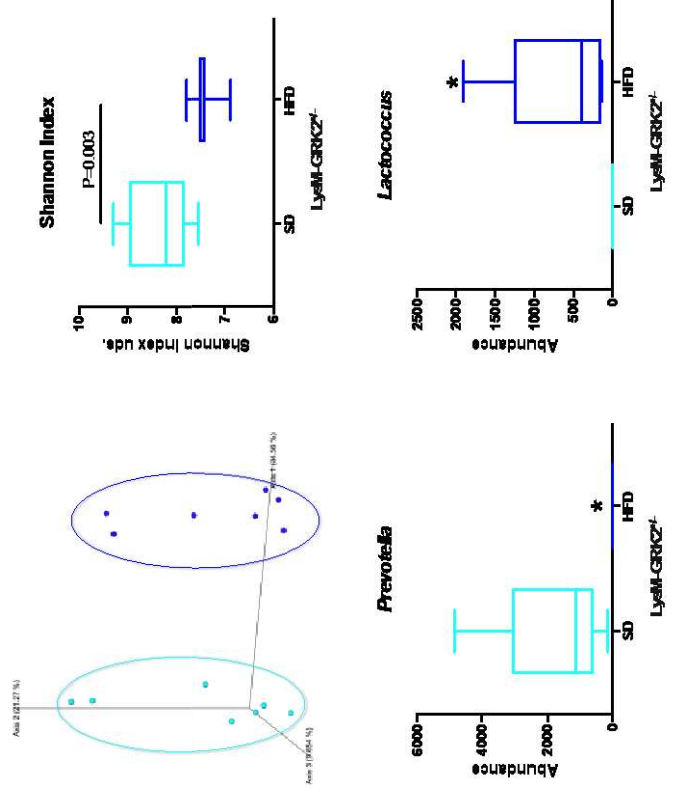

Supp. Fig. 4

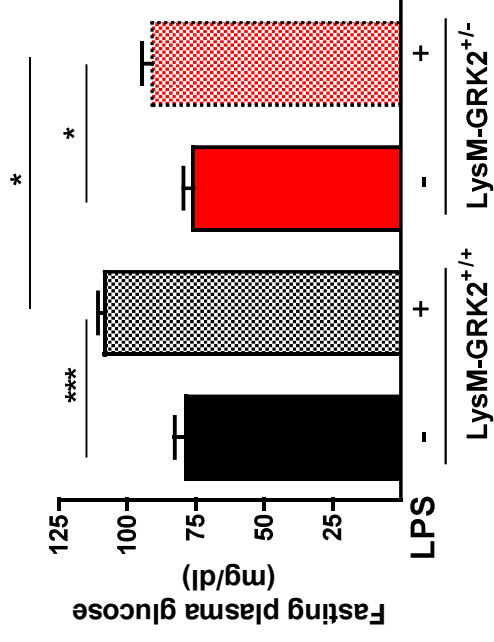

**Supplementary Table 1.** Primers used for real time PCR analysis:

|                     |                    |                                                                 |
|---------------------|--------------------|-----------------------------------------------------------------|
| <i>Emr1</i> (F4/80) | Forward<br>Reverse | 5'-AGTACGATGTGGGGCTTTTG-3'<br>5'-CCCCATCTGTACATCCCACT-3'        |
| <i>Tnf</i>          | Forward<br>Reverse | 5'-TCTTCTCATTCCCTGCTTGTGG-3'<br>5'-GGTCTGGGCCATAGAACTGA-3'      |
| <i>Il1b</i>         | Forward<br>Reverse | 5'-TGTAATGAAAGACGGCACACC-3'<br>5'-TCTTCTTTGGGTATTGCTTGG-3'      |
| <i>Il6</i>          | Forward<br>Reverse | 5'-TGATGGATGCTACCAAACCTGG-3'<br>5'-TTCATGTACTCCAGGTAGCTATGG-3'  |
| <i>Ccr2</i>         | Forward<br>Reverse | 5'-GGAGACAGCAGATCGAGTGA-3'<br>5'-TTACAACCCAACCGAGACCT-3'        |
| <i>Ccl2</i>         | Forward<br>Reverse | 5'-CATCCACGTGTTGGCTCA-3'<br>5'-GATCATCTTGCTGGTGAATGAGT-3'       |
| <i>Adipo</i>        | Forward<br>Reverse | 5'-CCTGGCCACTTTCTCCTCAT-3'<br>5'-ACAGGAGAGCTTGCAACAGT-3'        |
| <i>Lep</i>          | Forward<br>Reverse | 5'-CCAGGATGACACCAAACCCT-3'<br>5'-GCTGGTGAGGACCTGTTGAT-3'        |
| <i>Nrlp3</i>        | Forward<br>Reverse | 5'-TTCCCAGACACTCATGTTGC-3'<br>5'-AGAAGAGACCACGGCAGAA-3'         |
| <i>Ptgs2</i>        | Forward<br>Reverse | 5'-GATGCTCTTCCGAGCTGTG-3'<br>5'-GGATTGGAACAGCAAGGATTT-3'        |
| <i>Gapdh</i>        | Forward<br>Reverse | 5'-CTGCACCACCAACTGCTTAGC-3'<br>5'-GGTCATGAGCCCTCCACAAT-3'       |
| <i>Ywhaz</i>        | Forward<br>Reverse | 5'- TTACTTGGCCGAGGTTGCT-3<br>5'-TGCTGTGACTGGTCCACAAT-3'         |
| <i>Ppia</i>         | Forward<br>Reverse | 5'- ACGCCACTGTGCTTTTC-3'<br>5'- GCAAACAGCTCGAAGGAGAC-3'         |
| <i>B2m</i>          | Forward<br>Reverse | 5'- TACATACGCCTGCAGAGTTAAGCA-3<br>5'- TGATCACATGTCTCGATCCCAG-3' |
